# Supplementary material for: Comprehensive study of lumped kinetic models and bio-oil characterization in microwave-assisted pyrolysis of Sargassum sp.
Source: Royal Society of Chemistry journal article supplement (doi:10.1039/d3re00674c), 2024-01-01
Supplement: d3re00674c1.pdf [file d3re00674c1.pdf]

### Electronic Supplementary Information (ESI)

#### The yield of pyrolysis products over time at a particle size of 10-40 mesh

| Waktu, menit | Yield, gram    |                        |        |
|--------------|----------------|------------------------|--------|
|              | <i>Bio-oil</i> | <i>Remaining solid</i> | Gas    |
| 2            | 0,939          | 45,186                 | 3,875  |
| 2,5          | 1,554          | 44,443                 | 4,003  |
| 3            | 3,226          | 41,631                 | 5,143  |
| 3,5          | 3,366          | 41,005                 | 5,629  |
| 4            | 4,001          | 40,224                 | 5,775  |
| 5            | 4,296          | 39,284                 | 6,42   |
| 6            | 5,756          | 36,65                  | 7,594  |
| 7            | 7,181          | 32,971                 | 9,848  |
| 10           | 9,725          | 28,656                 | 11,619 |
| 15           | 11,647         | 25,26                  | 13,093 |
| 20           | 11,96          | 19,337                 | 18,703 |

#### The yield of pyrolysis products over time at a particle size of 40-70 mesh

| Waktu, menit | Yield, gram    |                        |        |
|--------------|----------------|------------------------|--------|
|              | <i>Bio-oil</i> | <i>Remaining solid</i> | Gas    |
| 2            | 2,698          | 42,33                  | 4,972  |
| 2,5          | 4,190          | 38,764                 | 7,046  |
| 3            | 5,619          | 33,566                 | 10,815 |
| 3,5          | 6,900          | 33,136                 | 9,964  |
| 4            | 8,183          | 30,843                 | 10,974 |
| 4,5          | 8,286          | 28,157                 | 13,557 |
| 5            | 9,019          | 27,002                 | 13,979 |
| 5,5          | 9,894          | 25,155                 | 14,951 |
| 8            | 10,901         | 24,863                 | 14,236 |
| 10           | 12,284         | 20,182                 | 17,534 |
| 15           | 12,921         | 19,198                 | 17,881 |
| 20           | 13,232         | 17,851                 | 18,917 |

#### The yield of pyrolysis products over time at a particle size of 70-100 mesh

| Waktu, menit | Yield, gram    |                        |        |
|--------------|----------------|------------------------|--------|
|              | <i>Bio-oil</i> | <i>Remaining solid</i> | Gas    |
| 2            | 0,622          | 46,238                 | 3,14   |
| 2,5          | 2,886          | 43,699                 | 3,415  |
| 3            | 3,564          | 42,101                 | 4,335  |
| 3,5          | 4,685          | 40,189                 | 5,126  |
| 4            | 5,645          | 39,447                 | 4,908  |
| 4,5          | 6,255          | 35,336                 | 8,409  |
| 5            | 6,601          | 34,162                 | 9,237  |
| 6            | 7,673          | 32,415                 | 9,912  |
| 7            | 8,611          | 31,773                 | 9,616  |
| 8            | 9,269          | 30,164                 | 10,567 |
| 10           | 9,841          | 26,195                 | 13,964 |
| 15           | 10,317         | 21,774                 | 17,909 |
| 20           | 10,595         | 18,844                 | 20,561 |

**The yield of pyrolysis products over time at a particle size of >100 mesh**

| Waktu, menit | Yield, gram    |                        |        |
|--------------|----------------|------------------------|--------|
|              | <i>Bio-oil</i> | <i>Remaining solid</i> | Gas    |
| 2            | 1,493          | 45,682                 | 2,825  |
| 2,5          | 3,215          | 43,220                 | 3,565  |
| 3            | 4,274          | 41,466                 | 4,260  |
| 3,5          | 5,538          | 37,898                 | 6,564  |
| 4            | 6,950          | 35,310                 | 7,740  |
| 5            | 7,990          | 31,280                 | 10,730 |
| 7            | 8,544          | 28,096                 | 13,360 |
| 10           | 8,946          | 25,853                 | 15,201 |
| 15           | 9,342          | 19,637                 | 21,021 |
| 20           | 9,789          | 14,774                 | 25,437 |

Sample Information

Analyzed by : Admin  
 Analyzed : 02/10/2023 12.17.38  
 Sample Name : F02  
 Sample ID : 2  
 Vial # : 2  
 Injection Volume : 1.00  
 Tuning File : C:\GCMSsolution\System\Tune1\11\_07\_2023.qgt

Chromatogram F02 C:\GCMSsolution\Data\Project1\12270923\_C\_GCMS\2i.qgd

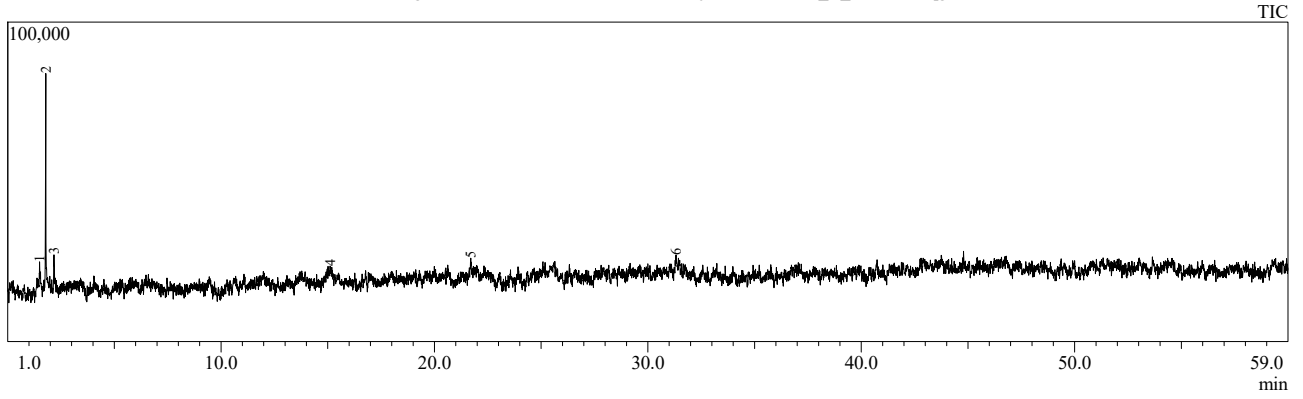

| Peak Report TIC |        |        |        |        |        |
|-----------------|--------|--------|--------|--------|--------|
| Peak#           | R.Time | I.Time | F.Time | Area   | Area%  |
| 1               | 1.500  | 1.433  | 1.550  | 6293   | 2.53   |
| 2               | 1.790  | 1.733  | 1.808  | 100826 | 40.53  |
| 3               | 2.173  | 2.092  | 2.325  | 44916  | 18.05  |
| 4               | 15.108 | 14.925 | 15.283 | 38131  | 15.33  |
| 5               | 21.699 | 21.608 | 21.792 | 12106  | 4.87   |
| 6               | 31.316 | 31.217 | 31.575 | 46526  | 18.70  |
|                 |        |        |        | 248798 | 100.00 |

C:\GCMSsolution\Data\Project1\12270923\_C\_GCMS\2i.qgd

## Similarity Search Result

&lt;&lt; Target &gt;&gt;

Line#:1 R.Time:1.500(Scan#:181) MassPeaks:313

RawMode:Averaged 1.492-1.508(180-182) BasePeak:78.05(407)

BG Mode:Calc. from Peak Group 1 - Event 1 Scan

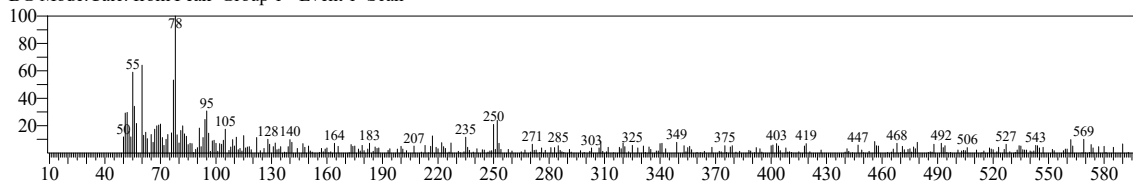

Hit#:1 Entry:17234 Library:WILEY7.LIB

SI:70 Formula:C8 H12 O CAS:10054-74-7 MolWeight:124 RetIndex:0

CompName:2,5-Cyclooctadien-1-ol (CAS) 2,5-Cyclooctadienol \$\$

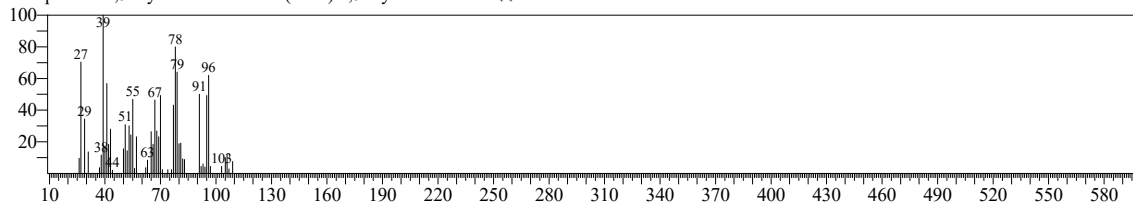

Hit#:2 Entry:17650 Library:WILEY7.LIB

SI:69 Formula:C8 H12 O CAS:6925-14-0 MolWeight:124 RetIndex:0

CompName:4-CYCLOOCTEN-1-ONE \$\$ 4-CYCLOOCTENONE \$\$

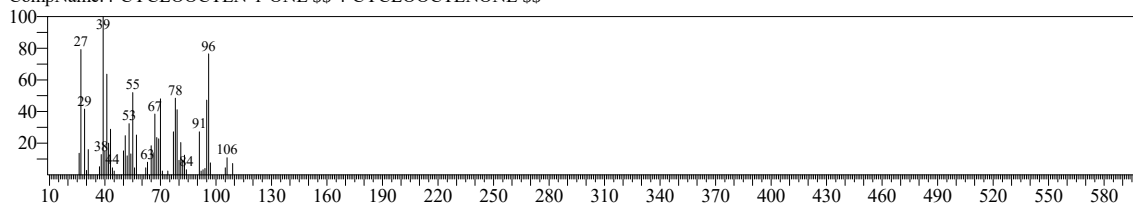

Hit#:3 Entry:187462 Library:WILEY7.LIB

SI:67 Formula:C20 H23 N CAS:0-00-0 MolWeight:277 RetIndex:0

CompName:DIMETHYLDIPHENYLTETHYLIDYLPYRROLIDINE \$\$

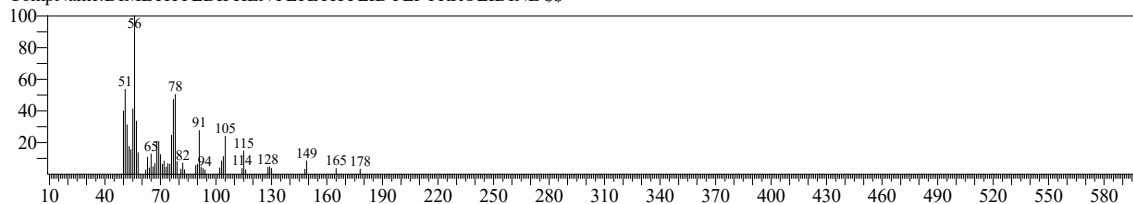

Hit#:4 Entry:192948 Library:WILEY7.LIB

SI:67 Formula:C18 H34 O2 CAS:1787-09-3 MolWeight:282 RetIndex:0

CompName:1-Hexadecen-1-ol, acetate (CAS)

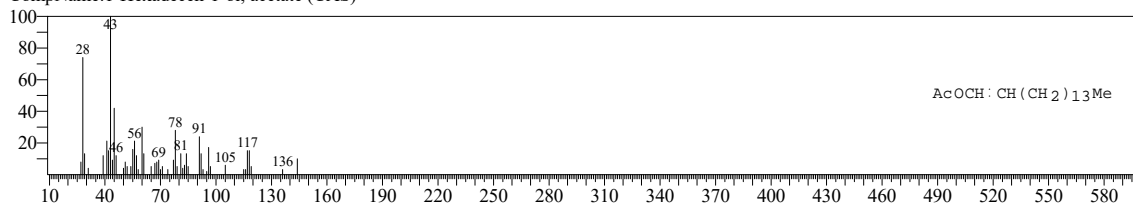

Hit#:5 Entry:304238 Library:WILEY7.LIB

SI:66 Formula:C21 H22 O11 CAS:8001-23-8 MolWeight:450 RetIndex:0

CompName:Hi-oleic safflower oil (CAS) Safflower oil \$\$

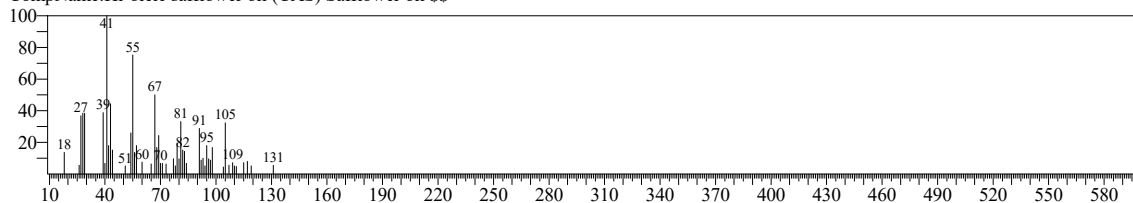

&lt;&lt; Target &gt;&gt;

Line#:2 R.Time:1.792(Scan#:216) MassPeaks:313  
 RawMode:Averaged 1.783-1.800(215-217) BasePeak:60.00(35902)  
 BG Mode:Calc. from Peak Group 1 - Event 1 Scan

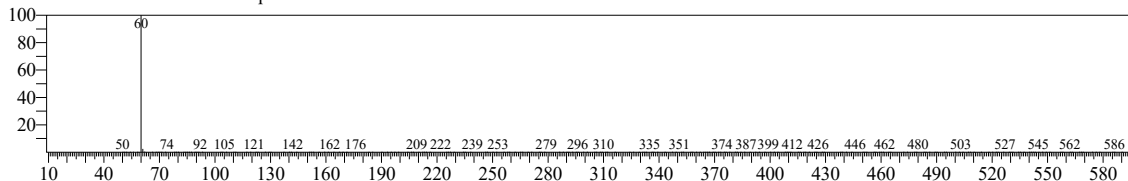

Hit#:1 Entry:627 Library:WILEY7.LIB

SI:98 Formula:C2 H4 O2 CAS:64-19-7 MolWeight:60 RetIndex:0

CompName:Acetic acid (CAS) Ethylic acid \$\$ Vinegar acid \$\$ Ethanoic acid \$\$ Glacial acetic acid \$\$ Methanecarboxylic acid \$\$ CH3COOH \$\$ component of Aci-Jel \$\$ Acetasol \$\$ Acide acetique \$\$ Acido acetico \$\$ Azijnzuur \$\$ Essigsaeure \$\$ Octowy kwas \$\$ Acetic acid, glacial \$\$ Kyselin a octova \$\$ UN 2789 \$\$ UN 2790 \$\$ Ethanoic acid monomer \$\$ Aci-Jel \$\$

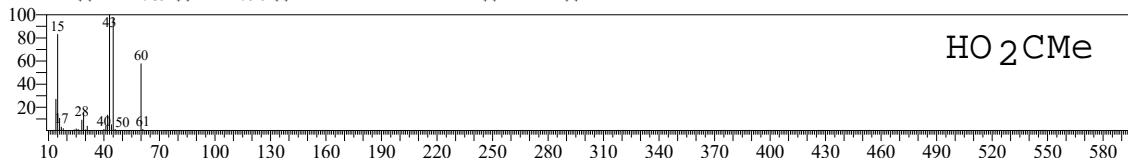

Hit#:2 Entry:616 Library:WILEY7.LIB

SI:98 Formula:C H4 N2 O CAS:57-13-6 MolWeight:60 RetIndex:0

CompName:Urea (CAS) Urevert \$\$ B-I-K \$\$ Ureophil \$\$ Ureaphil \$\$ Urea-13C \$\$ UR \$\$ Carbamide \$\$ Isourea \$\$ Carbamide resin \$\$ Carbonyl diamide \$\$ Pseudourea \$\$ Carbamimidic acid \$\$ Varioform ii \$\$ Benural 70 \$\$ Urepearl \$\$ Carbonyldiamide \$\$ (NH2)2CO \$\$ Carbonyl Diamine \$\$ component of Artra Ashy Skin Cream \$\$ Alphadrate \$\$ Aquacare HP \$\$ Aquadrate \$\$ Calmurid \$\$ Carbaderm \$\$ Keratinamin \$\$ NCI-C02119 \$\$ Pastaron \$\$ Prespersion, 75 urea \$\$ Ultra Mide \$\$ Mocovina \$\$ Supercel 3000 \$\$ Aqua Care \$\$

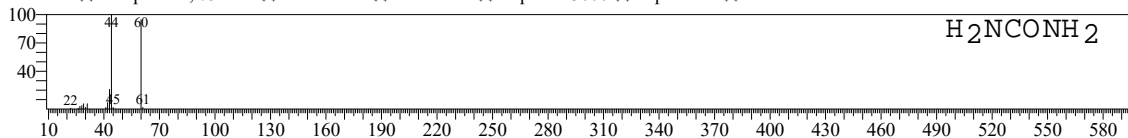

Hit#:3 Entry:642 Library:WILEY7.LIB

SI:98 Formula:C2 H4 O2 CAS:107-31-3 MolWeight:60 RetIndex:0

CompName:Formic acid, methyl ester (CAS) Methyl formate \$\$ Methyl methanoate \$\$ Methyl ester of formic acid \$\$ HCOOCH3 \$\$ Formiate de methyle \$\$ Methylester kyseliny mravenci \$\$ Methylformiaat \$\$ Methylformiat \$\$ Metil \$\$ Mravencan methylnaty \$\$ UN 1243 \$\$

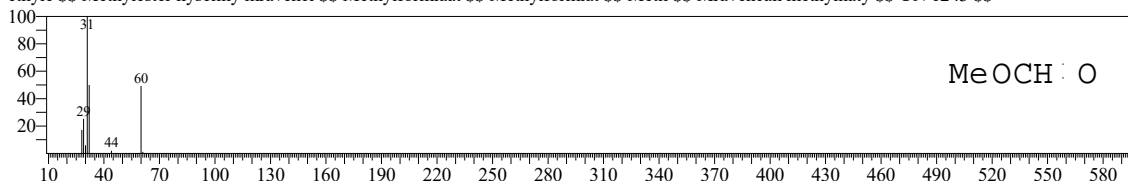

Hit#:4 Entry:633 Library:WILEY7.LIB

SI:98 Formula:C2 H4 O2 CAS:64-19-7 MolWeight:60 RetIndex:0

CompName:Acetic acid (CAS) Ethylic acid \$\$ Vinegar acid \$\$ Ethanoic acid \$\$ Glacial acetic acid \$\$ Methanecarboxylic acid \$\$ CH3COOH \$\$ component of Aci-Jel \$\$ Acetasol \$\$ Acide acetique \$\$ Acido acetico \$\$ Azijnzuur \$\$ Essigsaeure \$\$ Octowy kwas \$\$ Acetic acid, glacial \$\$ Kyselin a octova \$\$ UN 2789 \$\$ UN 2790 \$\$ Ethanoic acid monomer \$\$ Aci-Jel \$\$

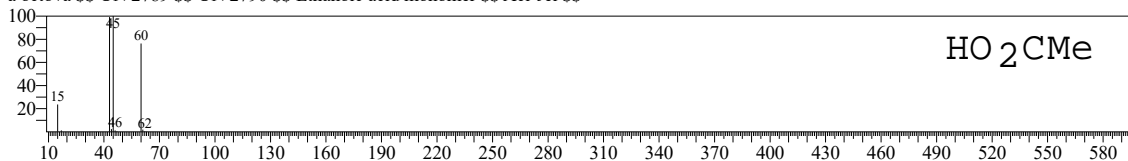

Hit#:5 Entry:621 Library:WILEY7.LIB

SI:98 Formula:C H4 N2 O CAS:57-13-6 MolWeight:60 RetIndex:0

CompName:Urea (CAS) Urevert \$\$ B-I-K \$\$ Ureophil \$\$ Ureaphil \$\$ Urea-13C \$\$ UR \$\$ Carbamide \$\$ Isourea \$\$ Carbamide resin \$\$ Carbonyl diamide \$\$ Pseudourea \$\$ Carbamimidic acid \$\$ Varioform ii \$\$ Benural 70 \$\$ Urepearl \$\$ Carbonyldiamide \$\$ (NH2)2CO \$\$ Carbonyl Diamine \$\$ component of Artra Ashy Skin Cream \$\$ Alphadrate \$\$ Aquacare HP \$\$ Aquadrate \$\$ Calmurid \$\$ Carbaderm \$\$ Keratinamin \$\$ NCI-C02119 \$\$ Pastaron \$\$ Prespersion, 75 urea \$\$ Ultra Mide \$\$ Mocovina \$\$ Supercel 3000 \$\$ Aqua Care \$\$

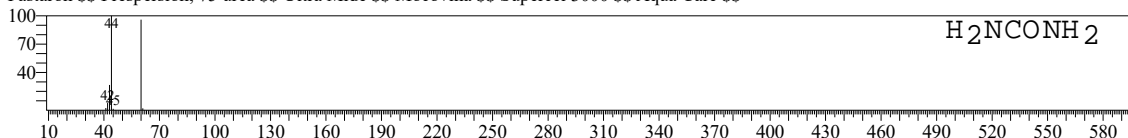

&lt;&lt; Target &gt;&gt;

Line#:3 R.Time:2.175(Scan#:262) MassPeaks:333  
 RawMode:Averaged 2.167-2.183(261-263) BasePeak:74.00(2657)  
 BG Mode:Calc. from Peak Group 1 - Event 1 Scan

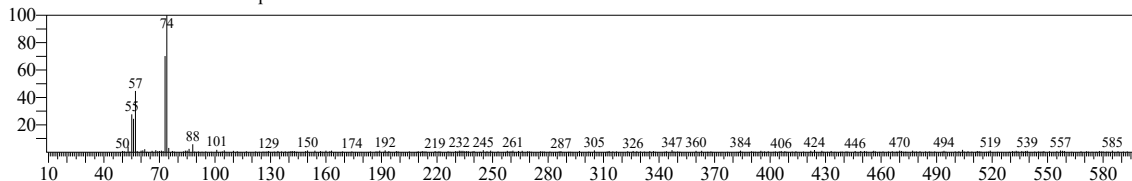

Hit#:1 Entry:1680 Library:WILEY7.LIB

SI:89 Formula:C3 H6 O2 CAS:79-09-4 MolWeight:74 RetIndex:0

CompName:Propanoic acid (CAS) Propionic acid \$\$ Prozoïn \$\$ Luprosil \$\$ Luprisol \$\$ Carboxyethane \$\$ Metacetonic acid \$\$ Ethylformic acid \$\$ Pseudoacetic acid \$\$ Ethanecarboxylic acid \$\$ Methylacetic acid \$\$ MonoProp \$\$ Antischim B \$\$ Propkorn \$\$ Propcorn \$\$ C2H5COOH \$\$ Acide propionique \$\$ Kyselina propionova \$\$ Propionic acid grain preserver \$\$ Sentry grain preserver \$\$ Tenox P grain preservative \$\$ UN 1848 \$\$

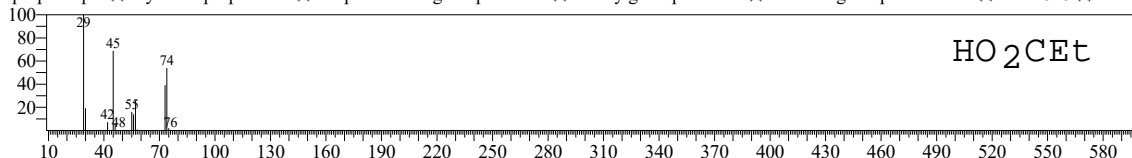

Hit#:2 Entry:1677 Library:WILEY7.LIB

SI:88 Formula:C3 H6 O2 CAS:79-09-4 MolWeight:74 RetIndex:0

CompName:Propanoic acid (CAS) Propionic acid \$\$ Prozoïn \$\$ Luprosil \$\$ Luprisol \$\$ Carboxyethane \$\$ Metacetonic acid \$\$ Ethylformic acid \$\$ Pseudoacetic acid \$\$ Ethanecarboxylic acid \$\$ Methylacetic acid \$\$ MonoProp \$\$ Antischim B \$\$ Propkorn \$\$ Propcorn \$\$ C2H5COOH \$\$ Acide propionique \$\$ Kyselina propionova \$\$ Propionic acid grain preserver \$\$ Sentry grain preserver \$\$ Tenox P grain preservative \$\$ UN 1848 \$\$

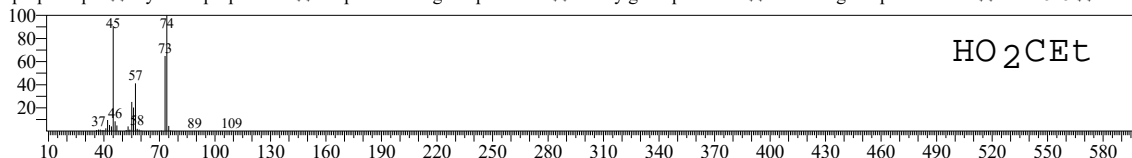

Hit#:3 Entry:1674 Library:WILEY7.LIB

SI:88 Formula:C3 H6 O2 CAS:79-09-4 MolWeight:74 RetIndex:0

CompName:Propanoic acid (CAS) Propionic acid \$\$ Prozoïn \$\$ Luprosil \$\$ Luprisol \$\$ Carboxyethane \$\$ Metacetonic acid \$\$ Ethylformic acid \$\$ Pseudoacetic acid \$\$ Ethanecarboxylic acid \$\$ Methylacetic acid \$\$ MonoProp \$\$ Antischim B \$\$ Propkorn \$\$ Propcorn \$\$

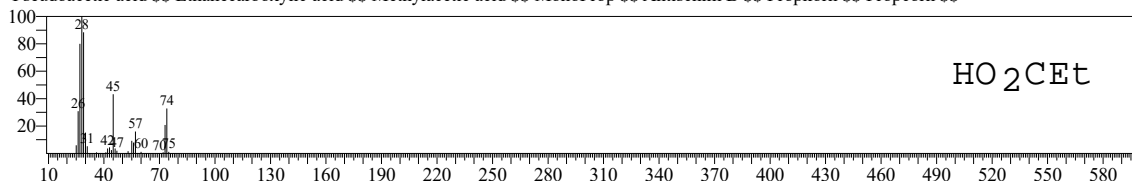

Hit#:4 Entry:1676 Library:WILEY7.LIB

SI:87 Formula:C3 H6 O2 CAS:79-09-4 MolWeight:74 RetIndex:0

CompName:Propanoic acid (CAS) Propionic acid \$\$ Prozoïn \$\$ Luprosil \$\$ Luprisol \$\$ Carboxyethane \$\$ Metacetonic acid \$\$ Ethylformic acid \$\$ Pseudoacetic acid \$\$ Ethanecarboxylic acid \$\$ Methylacetic acid \$\$ MonoProp \$\$ Antischim B \$\$ Propkorn \$\$ Propcorn \$\$ C2H5COOH \$\$ Acide propionique \$\$ Kyselina propionova \$\$ Propionic acid grain preserver \$\$ Sentry grain preserver \$\$ Tenox P grain preservative \$\$ UN 1848 \$\$

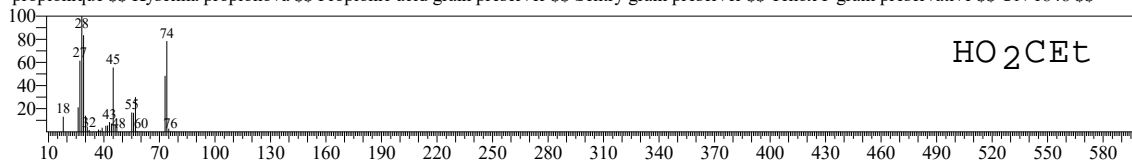

Hit#:5 Entry:1675 Library:WILEY7.LIB

SI:87 Formula:C3 H6 O2 CAS:79-09-4 MolWeight:74 RetIndex:0

CompName:Propanoic acid (CAS) Propionic acid \$\$ Prozoïn \$\$ Luprosil \$\$ Luprisol \$\$ Carboxyethane \$\$ Metacetonic acid \$\$ Ethylformic acid \$\$ Pseudoacetic acid \$\$ Ethanecarboxylic acid \$\$ Methylacetic acid \$\$ MonoProp \$\$ Antischim B \$\$ Propkorn \$\$ Propcorn \$\$ C2H5COOH \$\$ Acide propionique \$\$ Kyselina propionova \$\$ Propionic acid grain preserver \$\$ Sentry grain preserver \$\$ Tenox P grain preservative \$\$ UN 1848 \$\$

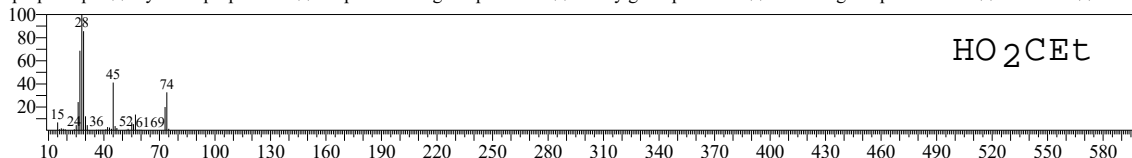

&lt;&lt; Target &gt;&gt;

Line#:4 R.Time:15.108(Scan#:1814) MassPeaks:316  
 RawMode:Averaged 15.100-15.117(1813-1815) BasePeak:314.00(51)  
 BG Mode:Calc. from Peak Group 1 - Event 1 Scan

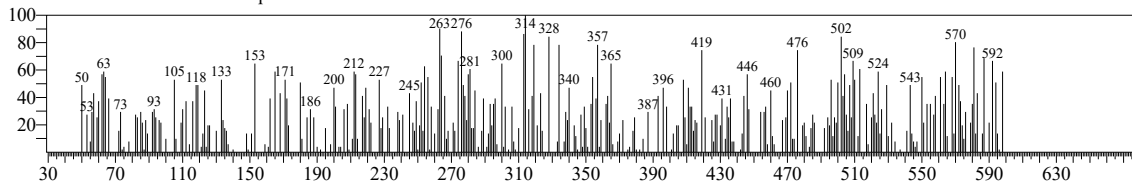

Hit#:1 Entry:223777 Library:WILEY7.LIB

SI:19 Formula:C18 H19 N S2 CAS:53563-23-8 MolWeight:313 RetIndex:0

CompName:N-Butyl-6,12-imino-6H,12H-dibenzo[b,f][1,5]dithiocin \$\$ 6H,12H-Dibenzo[b,f][1,5]dithiocin-6,12-imine, 13-butyl- (CAS)

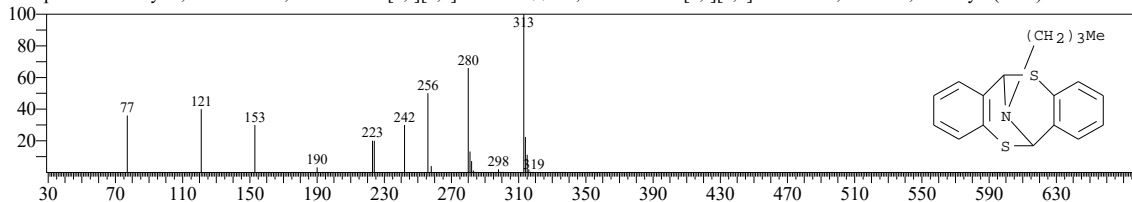

Hit#:2 Entry:332873 Library:WILEY7.LIB

SI:18 Formula:C19 H10 BR4 O5 S CAS:0-00-0 MolWeight:666 RetIndex:0

CompName:Bromphenol blue \$\$

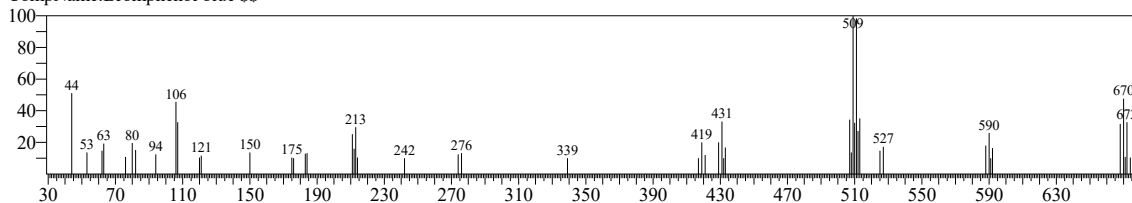

Hit#:3 Entry:255957 Library:WILEY7.LIB

SI:18 Formula:C3 H7 CL5 N3 P3 CAS:75155-05-4 MolWeight:353 RetIndex:0

CompName:1-Isopropylpentachlorocyclotriphosphazene \$\$

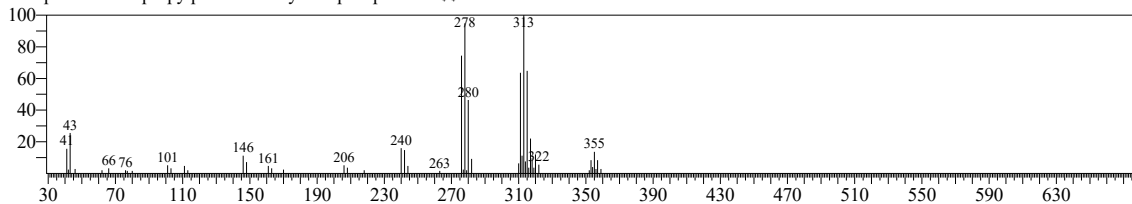

Hit#:4 Entry:190939 Library:WILEY7.LIB

SI:18 Formula:C22 H16 CAS:94154-55-9 MolWeight:280 RetIndex:0

CompName:1,2-BIS(4-AZULENYL)ETHYLENE \$\$

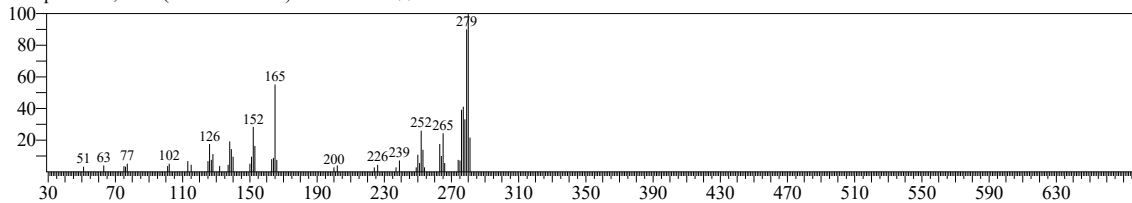

Hit#:5 Entry:294029 Library:WILEY7.LIB

SI:17 Formula:C24 H24 BR N O CAS:0-00-0 MolWeight:421 RetIndex:0

CompName:3-(4-BROMOPHENYL)-1-(4-ETHYLPHENYL)-3-(P-TOLUIDINO)-1-PROPANONE \$\$

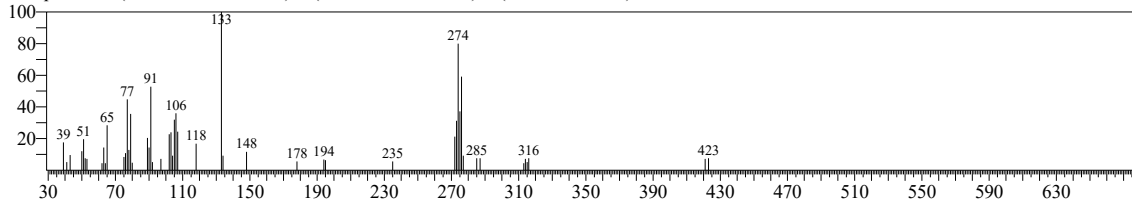

&lt;&lt; Target &gt;&gt;

Line#:5 R.Time:21.700(Scan#:2605) MassPeaks:331  
 RawMode:Averaged 21.692-21.708(2604-2606) BasePeak:502.00(56)  
 BG Mode:Calc. from Peak Group 1 - Event 1 Scan

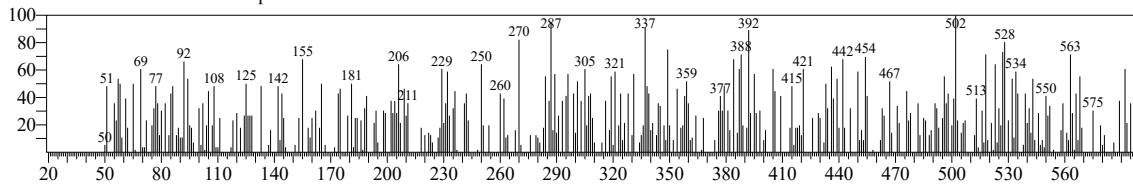

Hit#:1 Entry:305659 Library:WILEY7.LIB

SI:18 Formula:C31 H50 O2 CAS:55331-92-5 MolWeight:454 RetIndex:0

CompName:Cholesta-8,24-dien-3-ol, 4,14-dimethyl-, acetate, (3.beta.,4.alpha.)- (CAS) 3.BETA.-ACETOXY-4.ALPHA.,14.ALPHA.-DIMETHYLC HOLESTA-8,24-DIENE \$\$

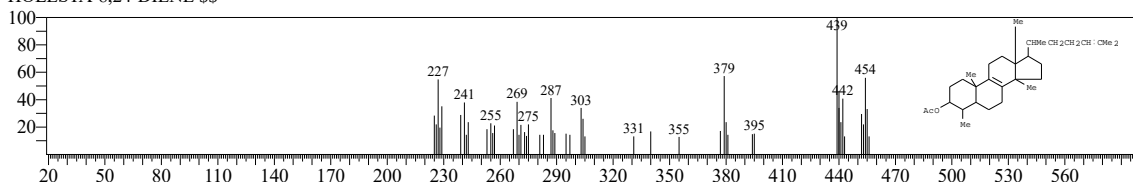

Hit#:2 Entry:321805 Library:WILEY7.LIB

SI:18 Formula:C29 H48 N2 O5 SI CAS:74299-02-8 MolWeight:532 RetIndex:0

CompName:Pregn-4-ene-3,20-dione, 21-(acetyloxy)-6-methyl-17-[(trimethylsilyloxy)-, 3,20-bis(O-methoxime), (6.alpha.)- (CAS)

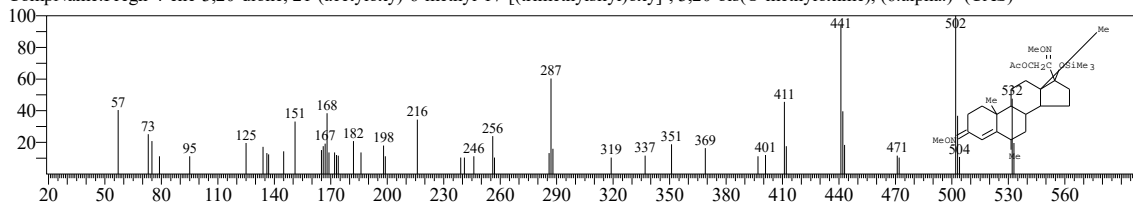

Hit#:3 Entry:315556 Library:WILEY7.LIB

SI:18 Formula:C26 H42 N2 O7 CAS:76757-85-2 MolWeight:494 RetIndex:0

CompName:N-Nitroso glycocholic acid \$\$

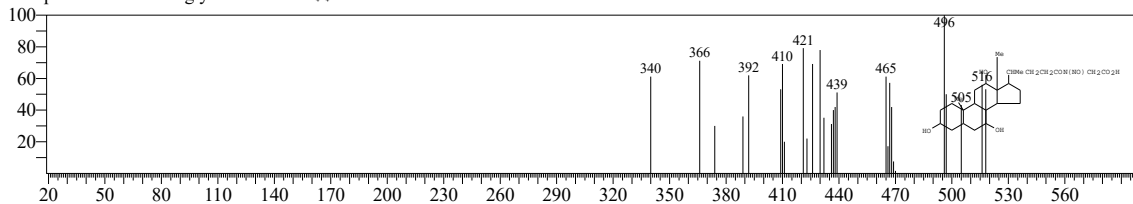

Hit#:4 Entry:325277 Library:WILEY7.LIB

SI:17 Formula:C33 H36 O8 CAS:5304-71-2 MolWeight:560 RetIndex:0

CompName:Morellic acid \$\$ 2-Butenoic acid, 2-methyl-4-[3a,4,5,7-tetrahydro-8-hydroxy-3,3,11,11-tetramethyl-13-(3-methyl-2-butenyl)-7,15-dioxo-1,5-methano-1H,3H,11H-furo[3,4-g]pyrano[3,2-b]xanthen-1-yl]- (CAS) 2-Butenoic acid, 2-methyl-4-[3a,4,5,7-tetrahydro-8-hydroxy-3,3,11,11-tetramethyl-13-(3-methyl-2-butenyl)-7,15-dioxo-1,5-methano-1H,3H,11H-furo[3,4-g]pyrano[3,2-b]xanthen-3a(4H)-protonic acid, 1,2,5,7-tetrahydro-8-hydroxy-.alpha.,2,2,11,11-pentamethyl-13-(3-methyl-2-butenyl)-4,7-dioxo

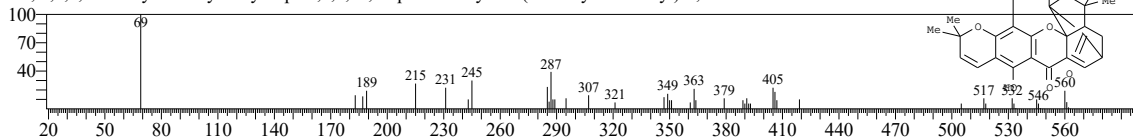

Hit#:5 Entry:334244 Library:WILEY7.LIB

SI:17 Formula:C33 H32 O17 CAS:0-00-0 MolWeight:700 RetIndex:0

CompName:2-(2-ACETOXY-1-(3',4',5'-TRIACETOXY-2-ACETOXYCARBONYLPYRAN-6-YLOXY)PHEN-4-YL-5,7-DIHYDROXY-3,6-DIMETHYLBENZO[B]PYRAN OR SPINATINPENTAACETATE \$\$

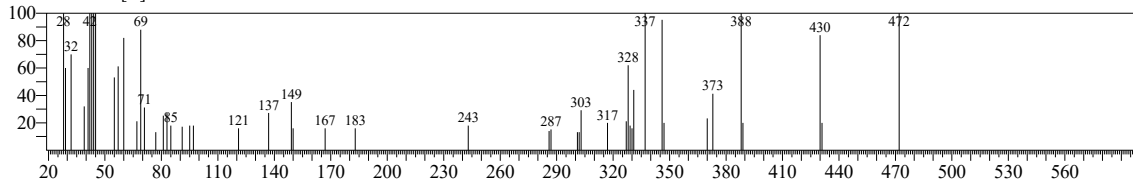



&lt;&lt; Target &gt;&gt;

Line#:6 R.Time:31.317(Scan#:3759) MassPeaks:359  
 RawMode:Averaged 31.308-31.325(3758-3760) BasePeak:522.00(53)  
 BG Mode:Calc. from Peak Group 1 - Event 1 Scan

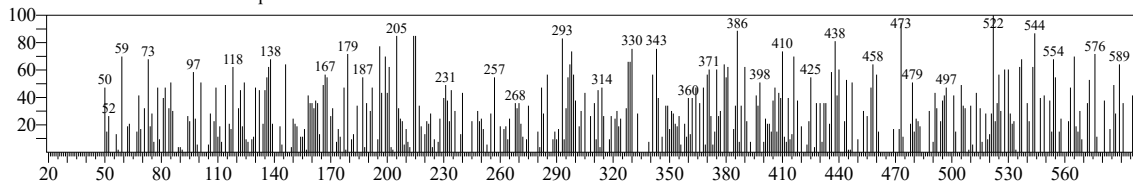

Hit#:1 Entry:308539 Library:WILEY7.LIB

SI:19 Formula:C27 H44 O6 CAS:17942-08-4 MolWeight:464 RetIndex:0

CompName:Deoxyruscicdysone \$\$ Cholest-7-en-6-one, 3,14,20,22,25-pentahydroxy-, (3.beta.,5.beta.,22R)- (CAS) 2-Deoxyruscicdysone \$\$ Crust  
 edysone, deoxy- \$\$ 2-Deoxy-.beta.-ecdysone \$\$ 5.beta.-Cholest-7-en-6-one, 3.beta.,14,20,22,25-pentahydroxy-, (22R)- \$\$

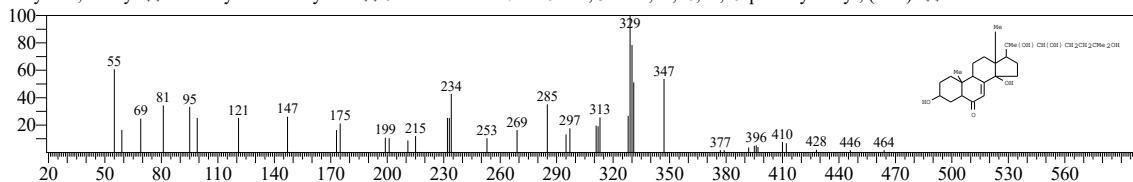

Hit#:2 Entry:194611 Library:WILEY7.LIB

SI:19 Formula:C15 H18 Cl2 O CAS:36383-95-6 MolWeight:284 RetIndex:0

CompName:1-Nonen-3-one, 1-(3,4-dichlorophenyl)- (CAS)

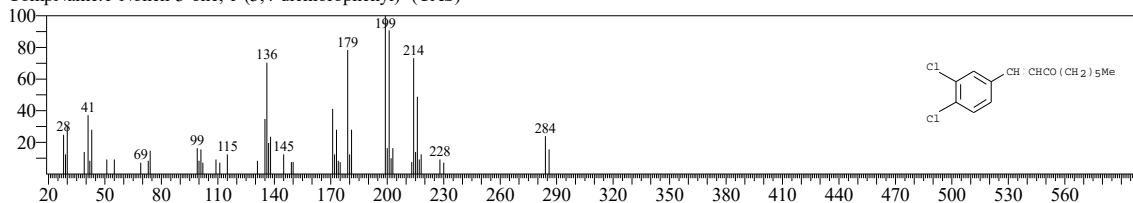

Hit#:3 Entry:322453 Library:WILEY7.LIB

SI:19 Formula:C30 H32 O9 CAS:58546-56-8 MolWeight:536 RetIndex:0

CompName:Gomisin C \$\$

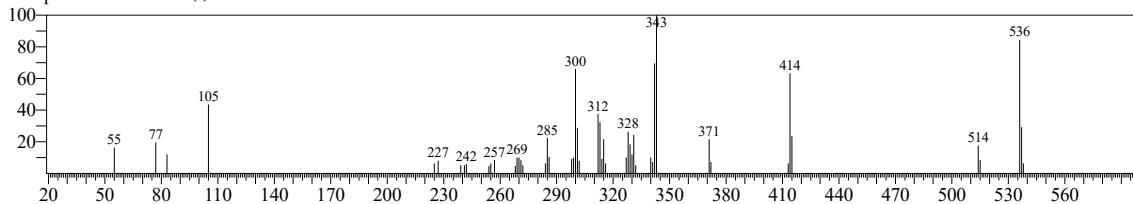

Hit#:4 Entry:268312 Library:WILEY7.LIB

SI:18 Formula:C21 H29 N3 O3 CAS:0-00-0 MolWeight:371 RetIndex:0

CompName:(+)-13c.beta.-(2-Amino-3-hydroxypropyl)-12-methoxy-1,2,3a.beta.,4,5,7,8,13-13b.beta.,13c-decahydrofuro[3,2-a]indolo[3,2-h]quinoliz  
 ine \$\$

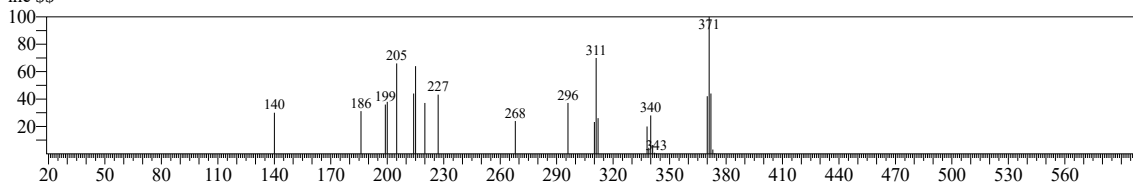

Hit#:5 Entry:320044 Library:WILEY7.LIB

SI:18 Formula:C29 H60 Si4 CAS:41898-92-4 MolWeight:520 RetIndex:0

CompName:Silane, 3,4-pentadien-1-yne-1,3-diyl-5-ylidenetetraakis[(1,1-dimethylethyl)dimethyl]- (CAS) 1,1,3,5-TETRAKIS(TERT-BUTYLDIMETH  
 YLSILYL)-1,2-PENTADIEN-4-YNE \$\$ Silane, 3,4-pentadien-1-yne-1,3-diyl-5-ylidenetetraakis@[(1,1-dimethylethyl)dimethyl]- \$\$

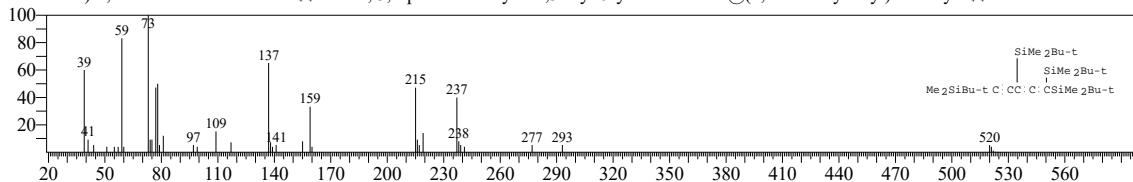

# UNIVERSITAS ISLAM INDONESIA

Jl. Kaliurang Km 14.5, Sleman Yogyakarta  
LABORATORIUM TERPADU  
Quantachrome TouchWin v1.22

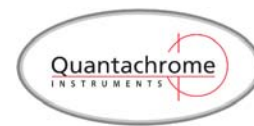

**Report date:** Fri Oct 6 2023      **Operator:** Yusuf  
**Filename:** 12570923\_1.qcuPhysIso

### Analysis Information

|                          |                                           |                         |                       |                                                   |
|--------------------------|-------------------------------------------|-------------------------|-----------------------|---------------------------------------------------|
| <b>Sample</b>            |                                           | <b>ID</b> 1257_1        | <b>Weight</b> 0.0851g |                                                   |
| <b>Description</b>       |                                           | CACOI                   |                       |                                                   |
| <b>Analysis</b>          |                                           |                         |                       |                                                   |
| <b>Data ID</b>           | {984ff6bd-2668-48dd-86fc-5660f353aa06}    |                         |                       |                                                   |
| <b>Operator</b>          | Yusuf                                     | <b>Date</b>             | 2023.10.05            | <b>Duration</b> 87.8min                           |
| <b>Instrument</b>        | St 3 on NOVA touch 4LX [s/n:170170510001] |                         | <b>Firmware</b>       | 1.07                                              |
| <b>Comments</b>          | description of sample                     |                         |                       |                                                   |
| <b>Ambient Temp.</b>     | 19.54°C                                   | <b>Void Volume Mode</b> | NOVA mode             | <b>Cell ID</b> 23                                 |
| <b>Cell Type</b>         | 9mm with rod                              | <b>Thermal Delay</b>    | 300sec                | <b>Po Mode</b> Continuous                         |
| <b>Adsorbate</b>         |                                           |                         |                       |                                                   |
| <b>Name</b>              | Nitrogen                                  | <b>Molecular Weight</b> | 28.013g/mol           | <b>Cross Section Area</b> 16.2Å <sup>2</sup> /mol |
| <b>Non-ideality</b>      | 6.580000e-05 1/torr                       | <b>Bath Temperature</b> | 77.35K                |                                                   |
| <b>Degas information</b> |                                           |                         |                       |                                                   |
| <b>Time</b>              | 3.0hours                                  | <b>Temp</b>             | 300.000000°C          |                                                   |

### Data Reduction Parameters

|                              |          |                           |                           |
|------------------------------|----------|---------------------------|---------------------------|
| <b>Thermal Transpiration</b> | no       |                           |                           |
| <b>Temp. Comp</b>            | no       |                           |                           |
| <b>Thickness Method</b>      | deBoer   |                           |                           |
| <b>P-tags below 0.35</b>     | ignored  |                           |                           |
| <b>Adsorbate Model</b>       |          |                           |                           |
| <b>Name</b>                  | Nitrogen | <b>Molecular Weight</b>   | 28.0134g                  |
| <b>Bath Temperature</b>      | 77.35K   | <b>Cross Section Area</b> | 16.2Å <sup>2</sup> /molec |
|                              |          | <b>Moving Pt. Average</b> | off                       |

### Area-Volume Summary results

#### Surface Area Results

**Multipoint BET** 12.296m<sup>2</sup>/g  
**BJH adsorption** 3.07529m<sup>2</sup>/g  
**BJH desorption** 0.973583m<sup>2</sup>/g

#### Pore Volume Results

**BJH adsorption cumulative micropore volume** 0.00745314cc/g  
**BJH desorption cumulative micropore volume** 0.00239761cc/g  
**Total Pore Volume** 0.0116114cc/g

#### Pore Size Results

**BJH adsorption pore radius** 2.04523nm  
**BJH desorption pore radius** 2.0498nm  
**Average Pore Size** 1.88865nm

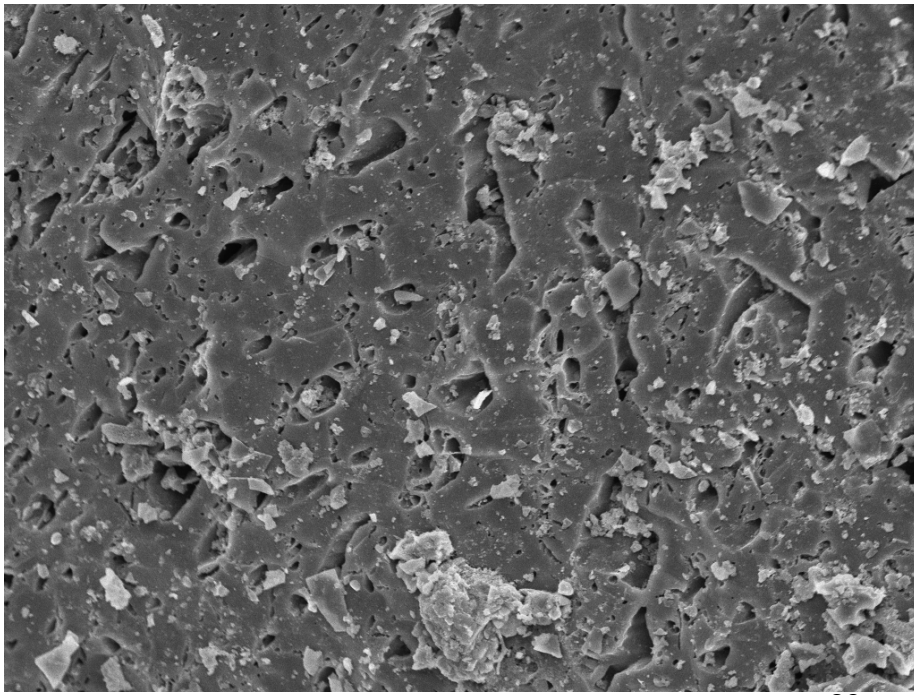

|            |              |
|------------|--------------|
| Title      | : IMG1       |
| Instrument | : 6510(LA)   |
| Volt       | : 10.00 kV   |
| Mag.       | : x 1,000    |
| Date       | : 2023/10/04 |
| Pixel      | : 1024 x 768 |

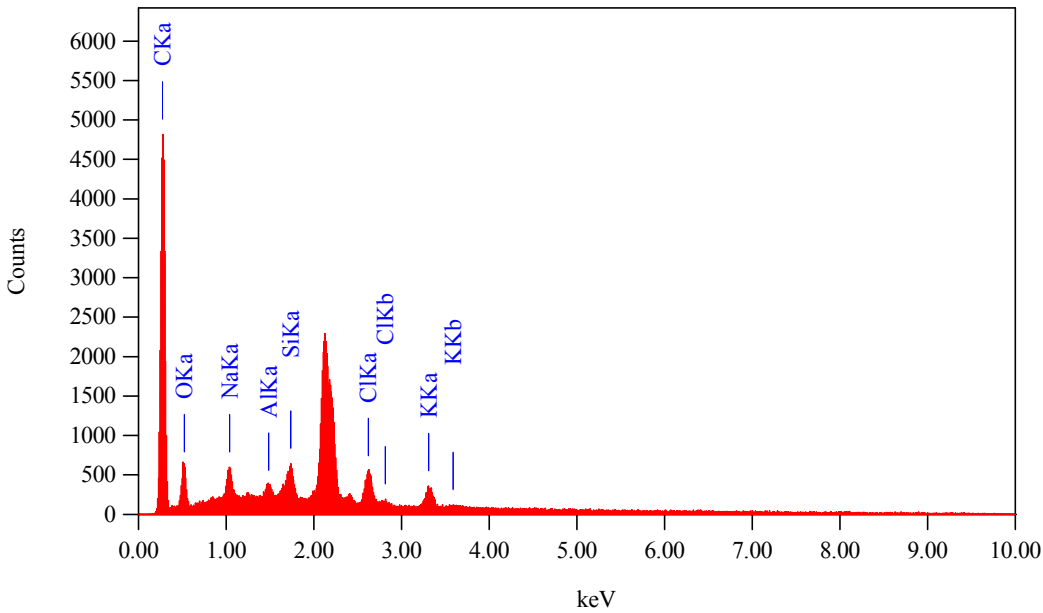

Acquisition Parameter

|               |              |
|---------------|--------------|
| Instrument    | : 6510(LA)   |
| Acc. Voltage  | : 10.0 kV    |
| Probe Current | : 1.00000 nA |
| PHA mode      | : T3         |
| Real Time     | : 51.40 sec  |
| Live Time     | : 50.00 sec  |
| Dead Time     | : 2 %        |
| Counting Rate | : 3068 cps   |
| Energy Range  | : 0 - 20 keV |

ZAF Method Standardless Quantitative Analysis  
 Fitting Coefficient : 0.2643

| Element | (keV) | Mass%  | Sigma | Atom%  | Compound | Mass% | Cation | K       |
|---------|-------|--------|-------|--------|----------|-------|--------|---------|
| C K     | 0.277 | 69.58  | 0.04  | 81.12  |          |       |        | 59.5906 |
| O K     | 0.525 | 12.86  | 0.09  | 11.26  |          |       |        | 11.3069 |
| Na K    | 1.041 | 2.30   | 0.04  | 1.40   |          |       |        | 3.4550  |
| Al K    | 1.486 | 1.25   | 0.05  | 0.65   |          |       |        | 1.9522  |
| Si K    | 1.739 | 2.41   | 0.06  | 1.20   |          |       |        | 4.0012  |
| Cl K    | 2.621 | 5.73   | 0.07  | 2.26   |          |       |        | 9.8754  |
| K K     | 3.312 | 5.88   | 0.10  | 2.11   |          |       |        | 9.8187  |
| Total   |       | 100.00 |       | 100.00 |          |       |        |         |

a. 2,5-Cyclooctadien-1-ol (CAS: 10054-74-7)

**Analysis spectra**

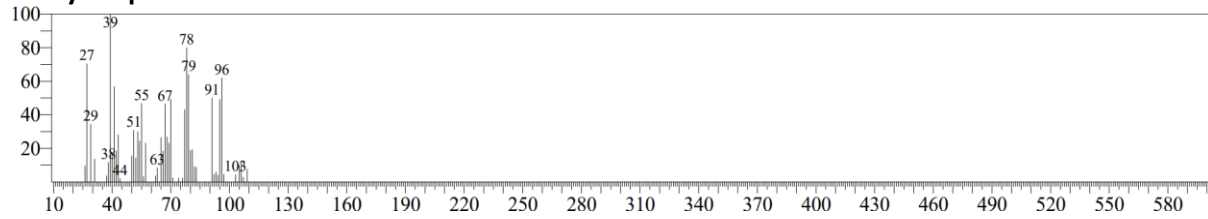

**Library spectra**

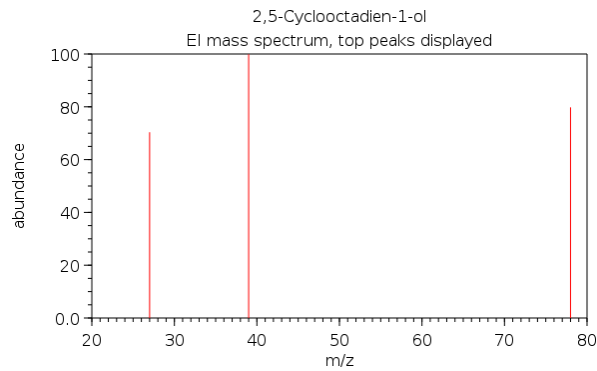

© 2014 by the U.S. Secretary of Commerce.

[https://pubchem.ncbi.nlm.nih.gov/compound/2\\_5-Cyclooctadien-1-ol](https://pubchem.ncbi.nlm.nih.gov/compound/2_5-Cyclooctadien-1-ol)

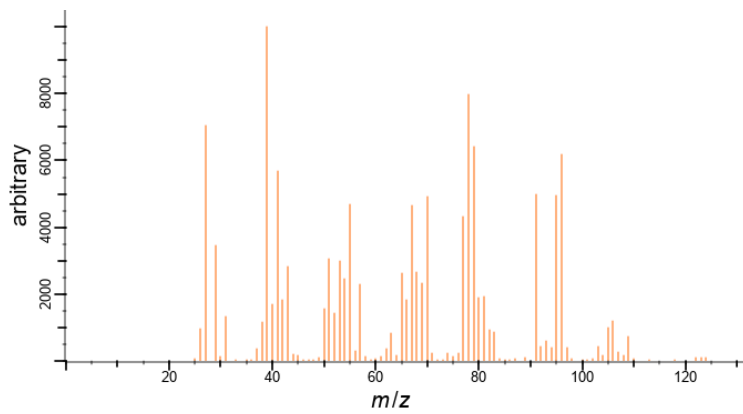

<https://spectrabase.com/spectrum/L3P3ftJzgy>

b. 4-Cycloocten-1-one

**Analysis spectra**

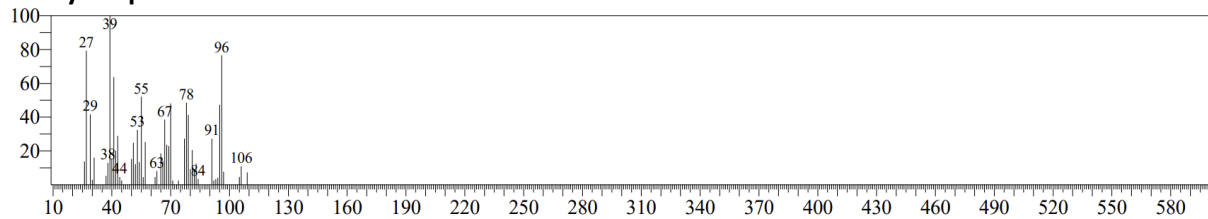

### Library spectra

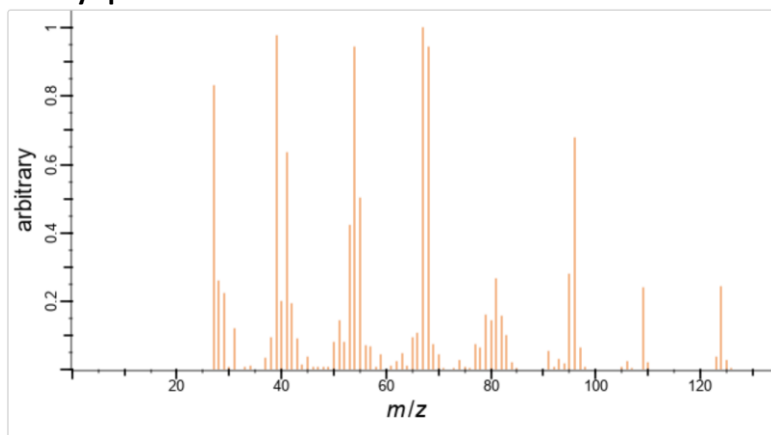

<https://spectrabase.com/spectrum/1YMzftGcWxC>

### c. 1-Hexadecene-1-ol acetate

#### Analysis spectra

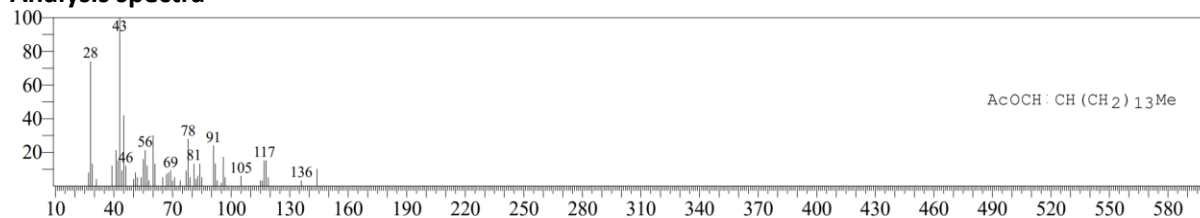

#### Library spectra

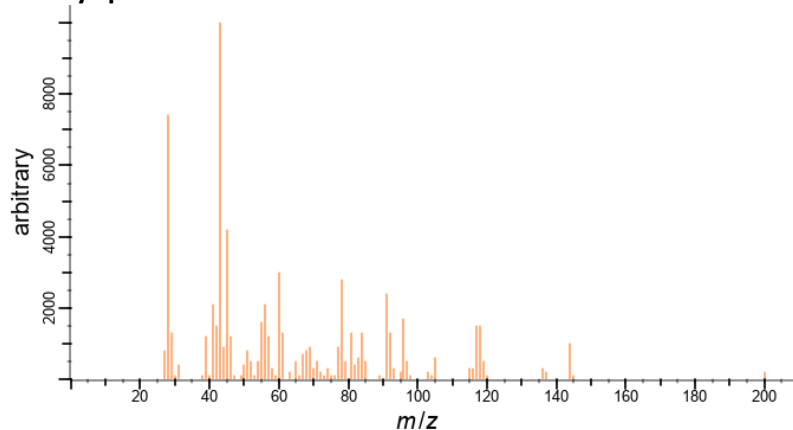

<https://spectrabase.com/spectrum/6AnlWQa0zGO>

### d. Acetic acid

#### Analysis spectra

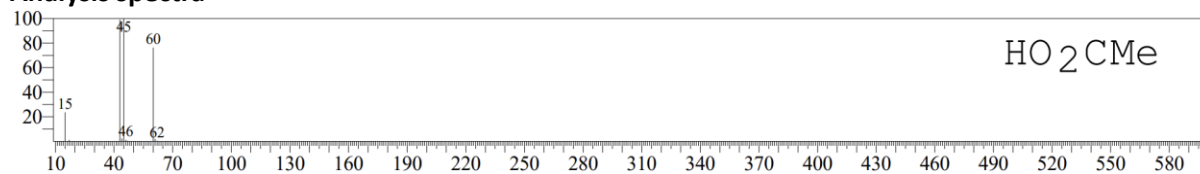

## Library spectra

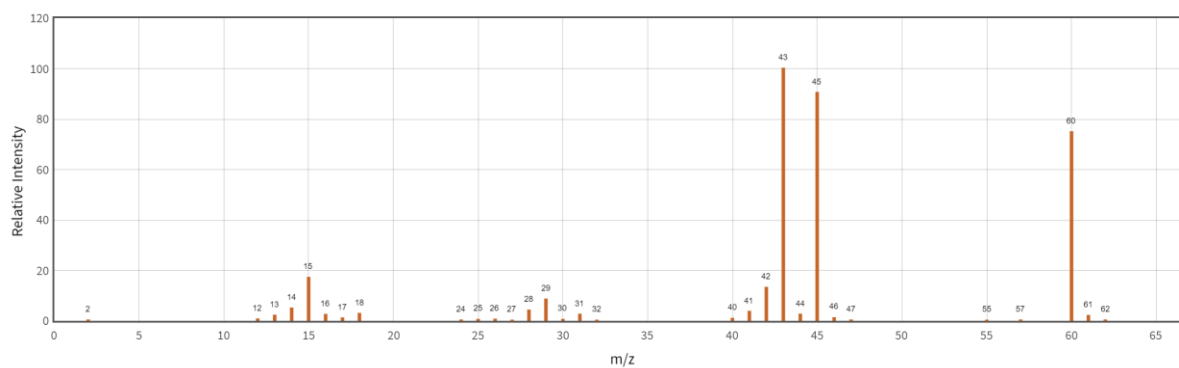

<https://webbook.nist.gov/cgi/cbook.cgi?ID=C64197&Mask=200>

## e. Methyl formate

### Analysis spectra

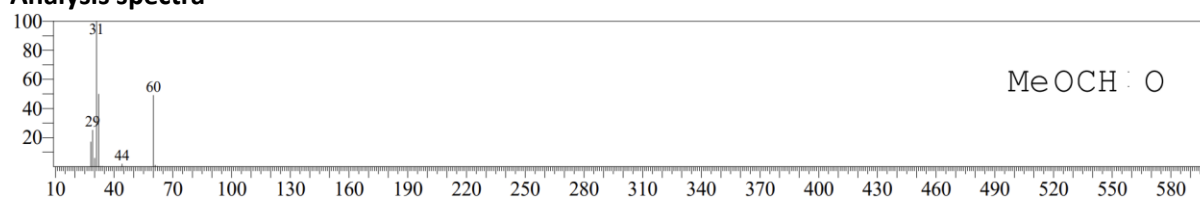

### Library spectra

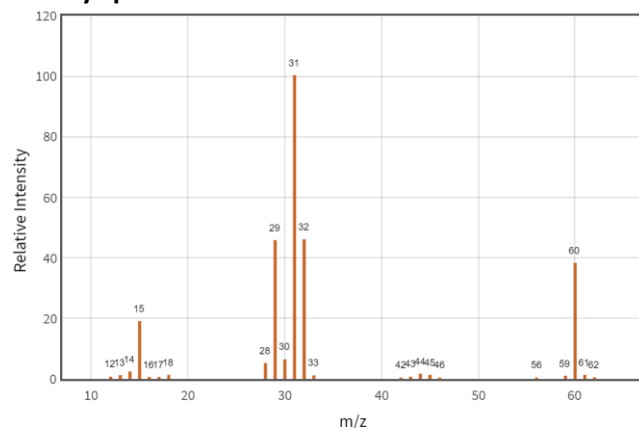

<https://webbook.nist.gov/cgi/cbook.cgi?ID=C107313&Mask=200>

## f. Propanoic acid

### Analysis spectra

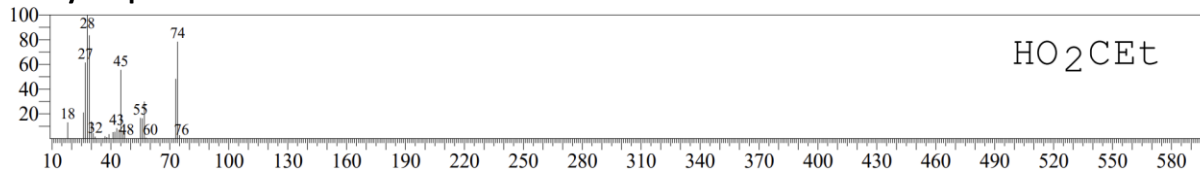

## Library spectra

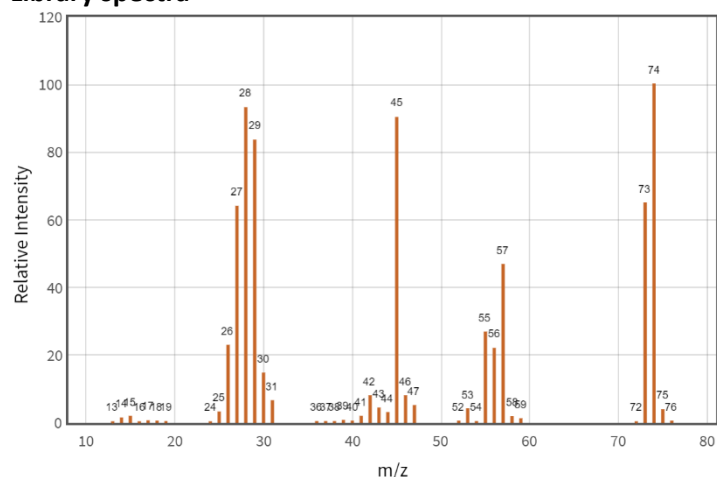

<https://webbook.nist.gov/cgi/cbook.cgi?ID=C79094&Mask=200>

g. N-Butyl-6,12-imino-6H, 12H-dibenzo[b,f][1,5] dithiocin

### Source

Natividad, R. (1997). A Novel Synthesis of 1,5-Dithiocins. [Master's thesis]. University of Toronto

h. Cholesta-8,24-dien-3-ol, 4,14-dimethyl-acetate (3 beta, 4 alpha)

Other name: 31-norlanosterol-acetate

### Library

<https://pubchem.ncbi.nlm.nih.gov/compound/31-Norlanosterol-acetate>

<https://www.chemo.com/cid/49-962-0/31-Norlanosterol-acetate>

<https://febs.onlinelibrary.wiley.com/doi/pdf/10.1111/j.1432-1033.1987.tb11075.x>

i. Pregn-4-ene-3, 20-dione, 21-(acetyloxy)-6-methyl-17-[(trimethylsilyl)oxy]-, 3,20-bis(O-methyloxime), (6 alpha)

### Analysis spectra

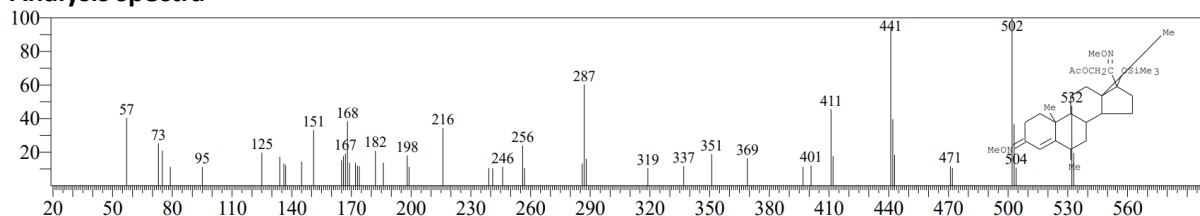

**Library spectra:** [Pregn-4-ene-3,20-dione, 17-\(acetyloxy\)-6-methyl-21-\[\(trimethylsilyl\)oxy\]-, 3,20-bis\(O-methyloxime\), \(6.alpha.\)-](#)

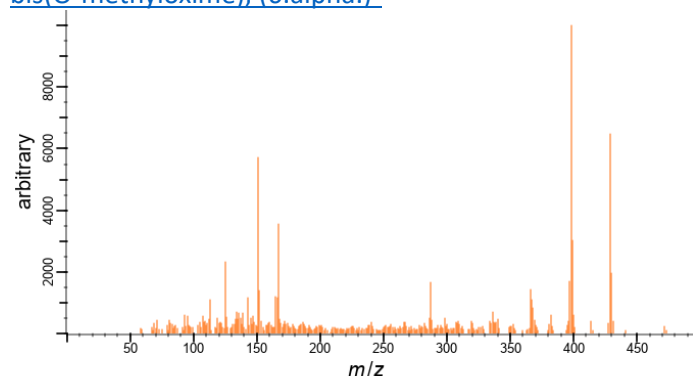

<https://spectrabase.com/spectrum/8vaaubOHvBe>

**Library spectra:** Pregn-4-ene-3,20-dione, 17-(acetyloxy)-6-methyl-6-[(trimethylsilyl)oxy]-, 3-(O-methyloxime), (6.beta.)-

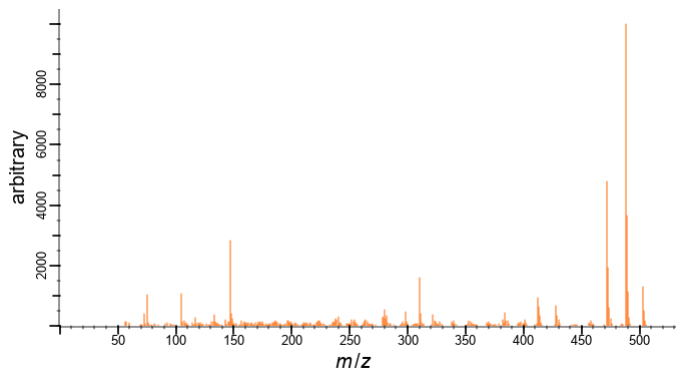

<https://spectrabase.com/spectrum/B1e4wQNNZ68>

j. Deoxycrustecdysone

**Analysis spectra**

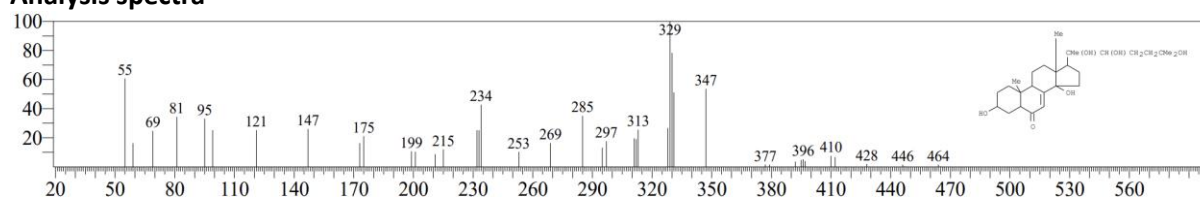

**Library spectra**

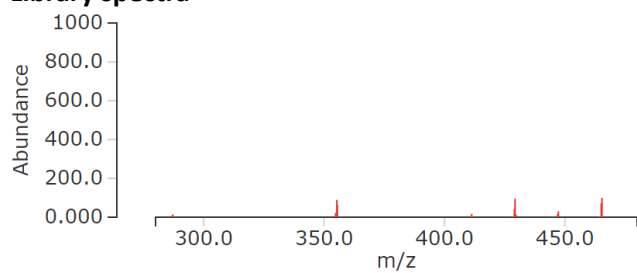

[https://massbank.eu/MassBank/RecordDisplay?id=MSBNK-RIKEN\\_NPDepo-NGA00021&dsn=RIKEN\\_NPDepo](https://massbank.eu/MassBank/RecordDisplay?id=MSBNK-RIKEN_NPDepo-NGA00021&dsn=RIKEN_NPDepo)



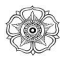

Lab Kimia Organik FMIPA - UGM

GCMS-QP2010S SHIMADZU

Kolom : DB-5MS  
 Panjang : 30 meter  
 ID : 0,25 mm  
 Film : 0,25 um  
 Gas pembawa : Helium  
 Pengionan : EI 70 Ev

Method

[Comment]

==== Analytical Line 1 =====

[GC-2010]

Column Oven Temp. :100.0 °C  
 Injection Temp. :300.00 °C  
 Injection Mode :Splitless  
 Sampling Time :1.00 min  
 Flow Control Mode :Pressure  
 Pressure :13.7 kPa  
 Total Flow :24.8 mL/min  
 Column Flow :0.44 mL/min  
 Linear Velocity :24.5 cm/sec  
 Purge Flow :3.0 mL/min  
 Split Ratio :49.0  
 High Pressure Injection :OFF  
 Carrier Gas Saver :OFF

| Oven Temp. Program | Rate | Temperature(°C) | Hold Time(min) |
|--------------------|------|-----------------|----------------|
| -                  |      | 100.0           | 5.00           |
| 5.00               |      | 300.0           | 45.00          |

&lt; Ready Check Heat Unit &gt;

Column Oven : Yes  
 SPL1 : Yes  
 MS : Yes

&lt; Ready Check Detector(FTD) &gt;

&lt; Ready Check Baseline Drift &gt;

&lt; Ready Check Injection Flow &gt;

SPL1 Carrier : Yes  
 SPL1 Purge : Yes

&lt; Ready Check APC Flow &gt;

&lt; Ready Check Detector APC Flow &gt;

External Wait :No  
 Equilibrium Time :3.0 min

[GC Program]

[GCMS-QP2010]

IonSourceTemp :250.00 °C  
 Interface Temp. :305.00 °C  
 Solvent Cut Time :5.00 min  
 Detector Gain Mode :Relative  
 Detector Gain :+0.00 kV  
 Threshold :0

[MS Table]

--Group 1 - Event 1--

Start Time :5.20min  
 End Time :90.00min  
 ACQ Mode :Scan  
 Event Time :0.50sec  
 Scan Speed :1250  
 Start m/z :28.00  
 End m/z :600.00

Sample Inlet Unit :GC

[MS Program]

Use MS Program :OFF
